# Supplementary material for: A qPCR expression assay of IFI44L gene differentiates viral from bacterial infections in febrile children
Source: Springer Nature journal article supplement (doi:10.1038/s41598-019-48162-9), 2019-08-13
Supplement: MOESM1 [file 41598_2019_48162_MOESM1_ESM.pdf]

# A qPCR expression assay of *IFI44L* gene differentiates viral from bacterial infections in febrile children

Alberto Gómez-Carballa, Miriam Cebey-López, Jacobo Pardo-Seco, Ruth Barral-Arca, Irene Rivero-Calle, Sara Pischedda, María José Currás-Tuala, José Gómez-Rial, Francisco Barros, Federico Martín-Torres, Antonio Salas

## Supplementary Figures

Supplementary Figure S1. Correlation matrix comparing the different methods to best candidate reference gene selection according to gene stability.

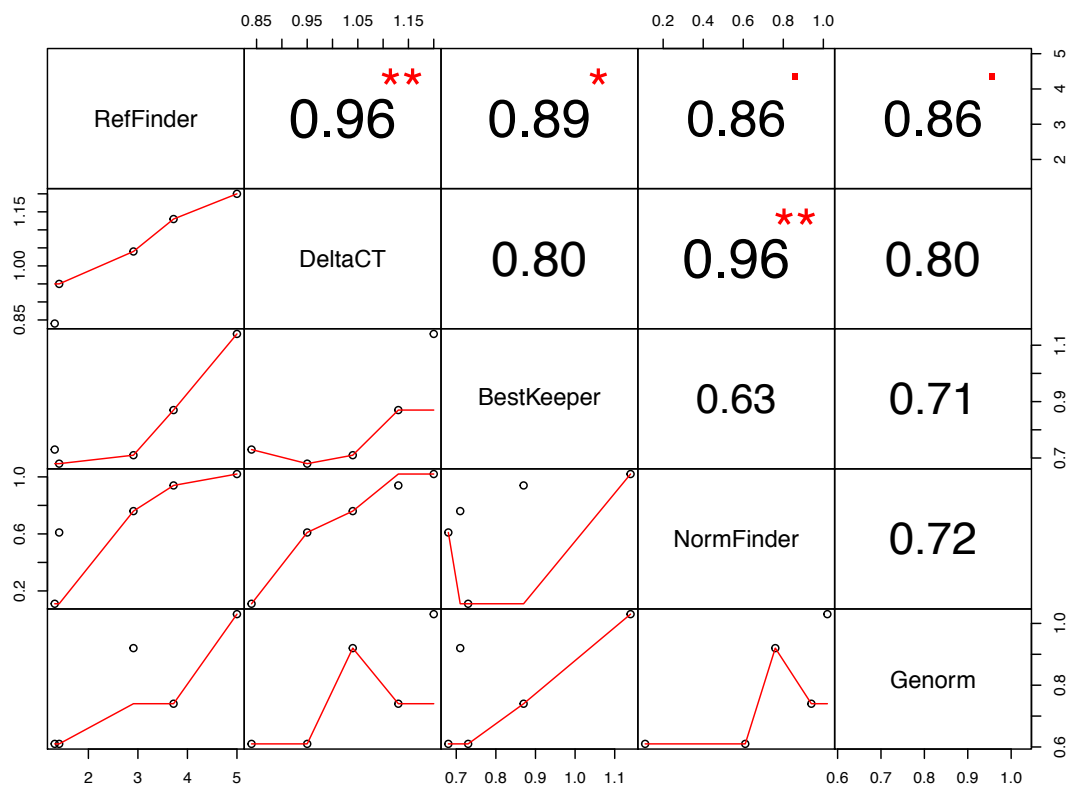

Supplementary Figure S2. Barplots representing *FAM89A* and *IFI44L* fold change values in viral and bacterial groups using control group as calibrator and different normalization references.

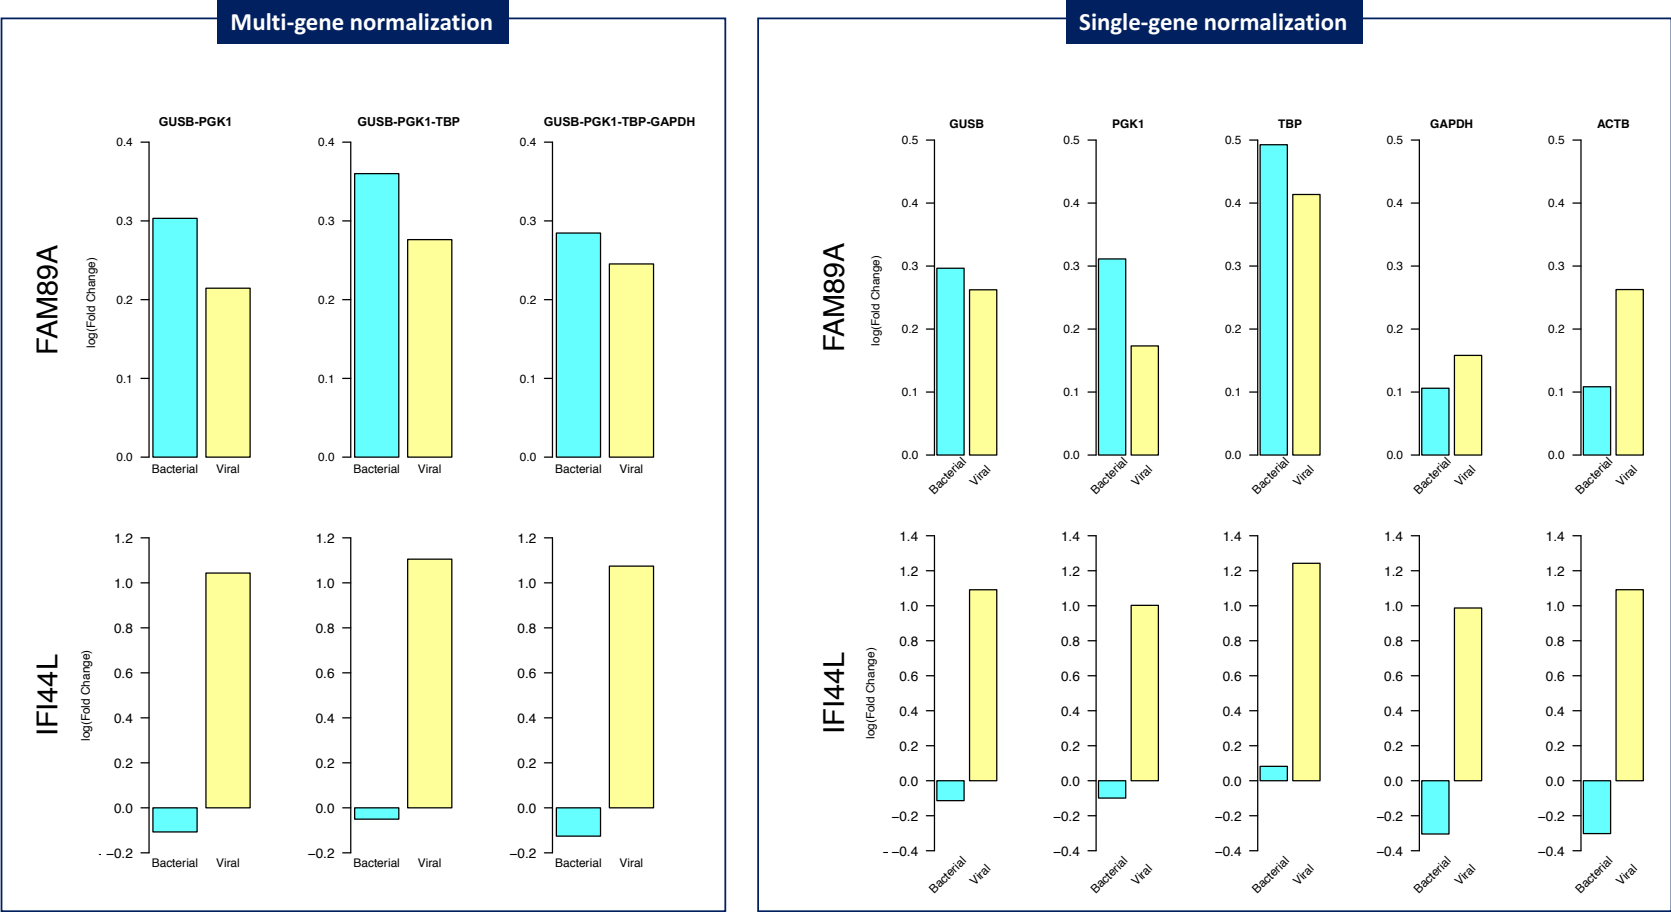

**Supplementary Figure S3. Correlation matrixes of *FAM89A* and *IFI44L* relative expression data comparing different normalization references.** Letters located in the diagonal indicate different reference gene options: A (*GUSB*), B (*GUSB-PGK1*), C (*GUSB-PGK1-TBP*), D (*GUSB-PGK1-TBP-GAPDH*), E (*PGK1*), F (*TBP*), G (*GAPDH*), H (*ACTB*).

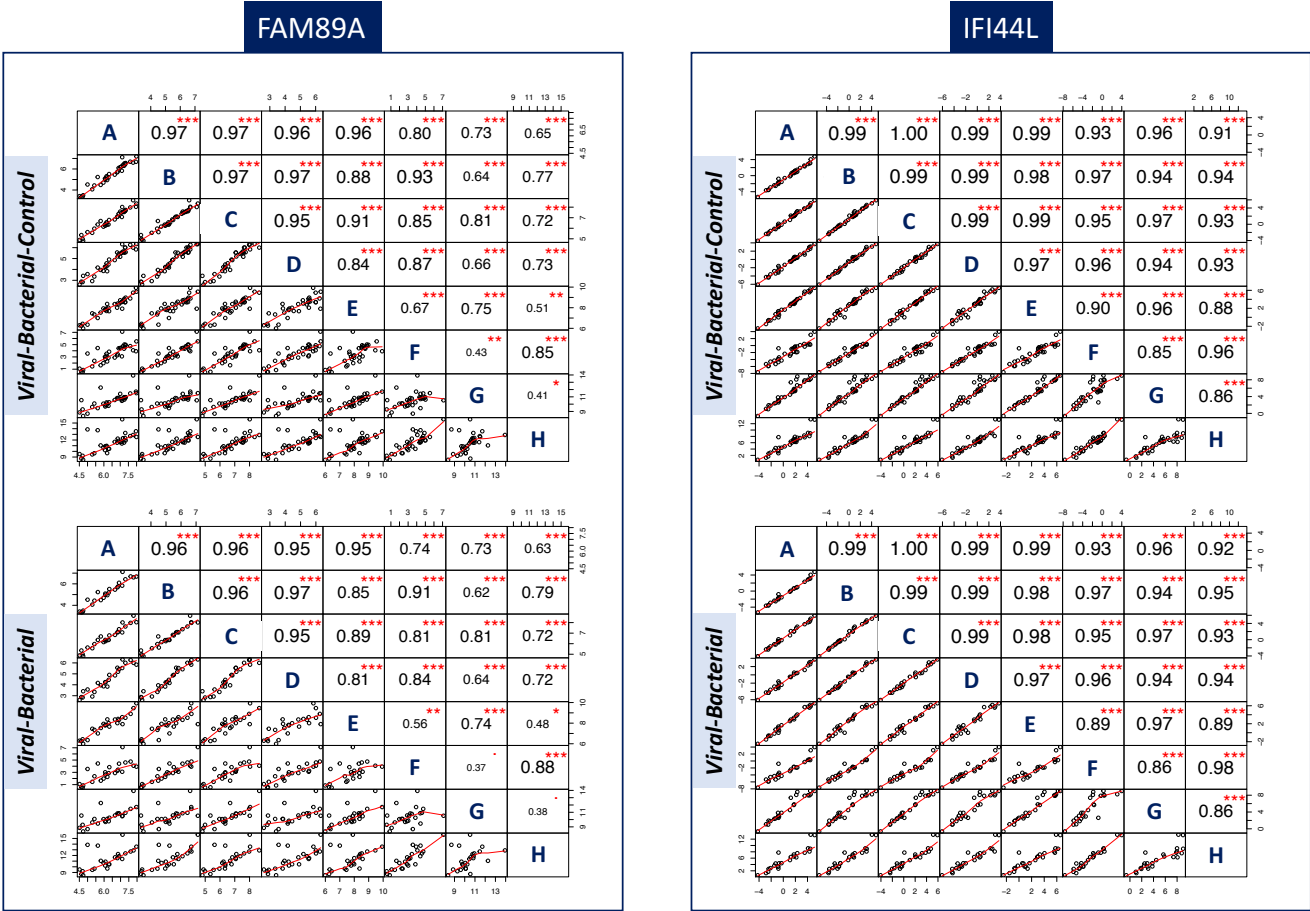

**Supplementary Figure S4. Boxplots of 2-transcript DRS values from bacterial, viral and control groups using different reference genes to normalize the expression.**

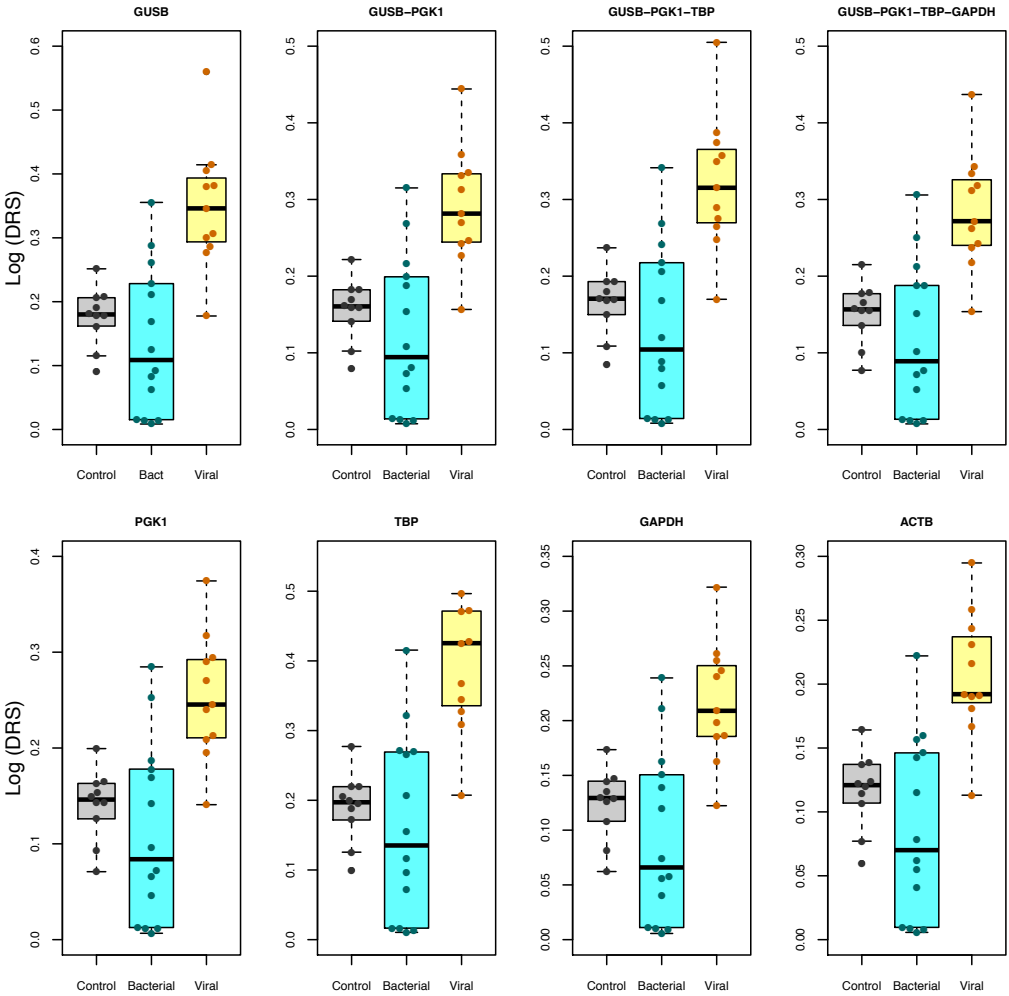



**Supplementary Figure S6. ROC curves of DRS calculated from different reference gene(s) combinations. (A) normalized expression data from a single reference gene and (B) normalized expression data from multiple reference genes, to study 2-transcript DRS test stability. AUC values are also represented.**

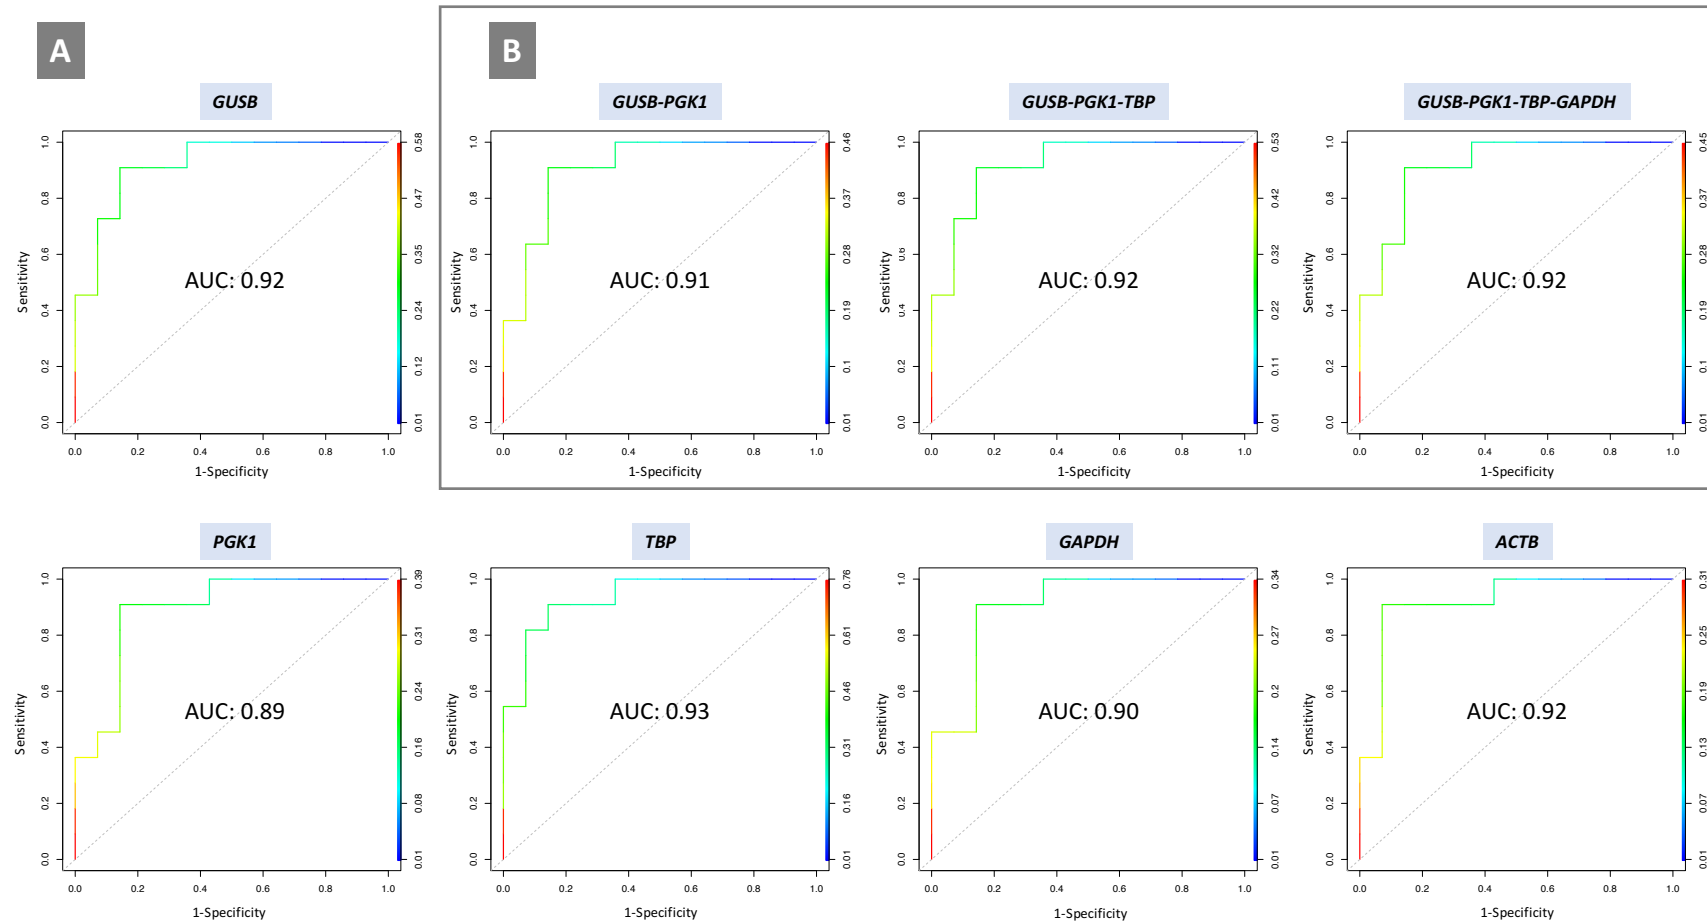

**Supplementary Figure S7. Evaluation of DRS test performance in microarray data from probable bacterial and probable viral infection in febrile children.** (A) Boxplot of DRS values using 1-transcript signature (IFI44L). (B) Boxplot of DRS using 2-transcript signature. (C) ROC curves generated from 2-transcript (black) and 1-transcript ([IFI44L; blue], [FAM89A; yellow]) DRS with AUC values and 95% CI. We used a t-test to evaluate the statistical significance of differences in DRS values between bacterial and viral patients in panels (A) and (B) (*P*-value is noted). The box represents the interquartile range (25<sup>th</sup> to the 75<sup>th</sup>) containing the middle 50% of the data, the line in the box represents the median and the whiskers represent the ranges for the bottom 25% and the top 25% of the data values, excluding outliers.

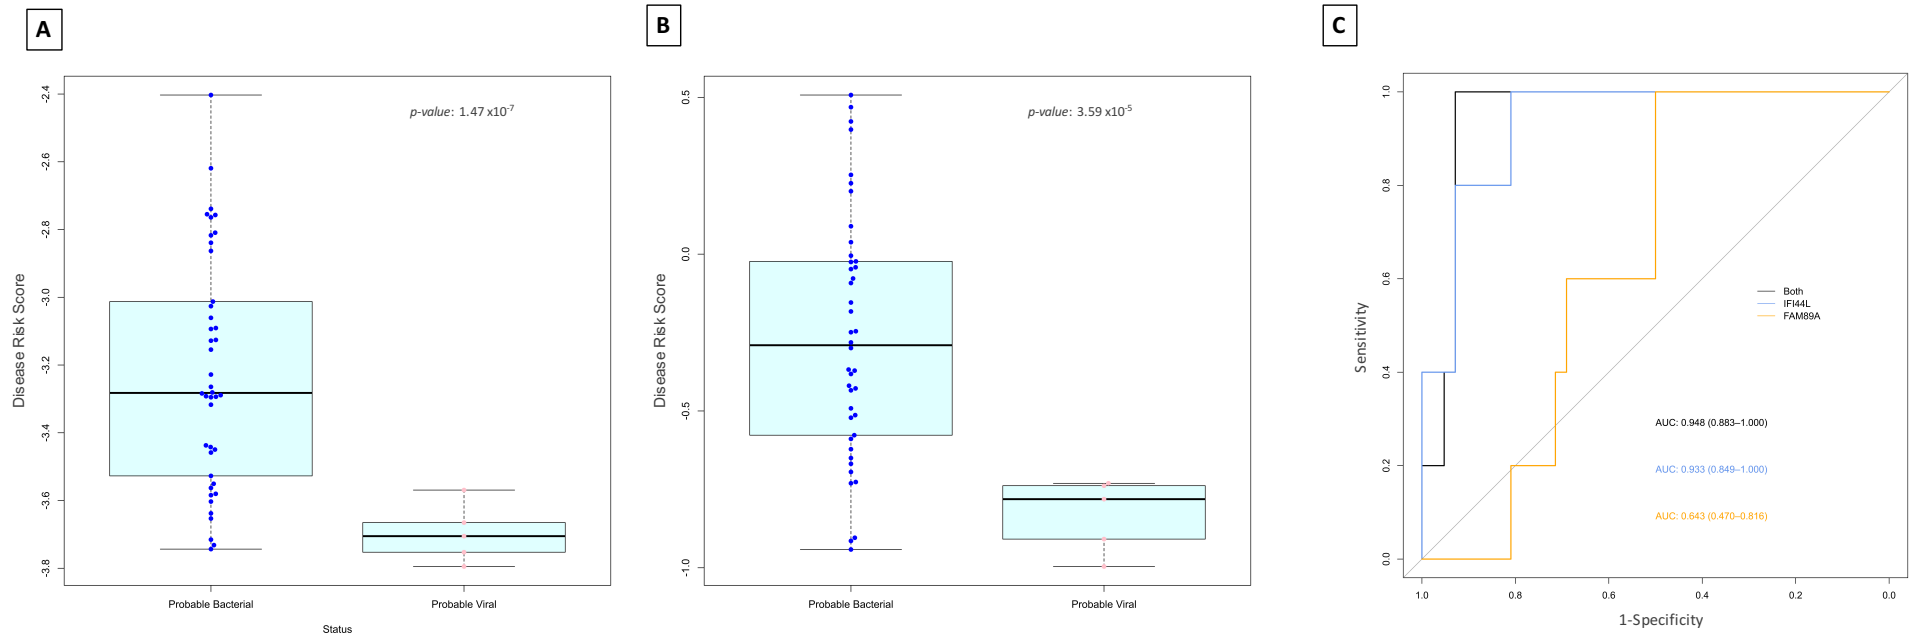

## Supplementary Tables

**Supplementary Table S1. Quality (A260/280) and quantity (ng/ $\mu$ l) measurements of the RNA samples.**

| <b>Cohort</b> | <b>Sample ID</b> | <b>ng/<math>\mu</math>l</b> | <b>A260/280</b> |
|---------------|------------------|-----------------------------|-----------------|
| Bacterial     | B1               | 107                         | 2.03            |
| Bacterial     | B10              | 251.8                       | 1.98            |
| Bacterial     | B11              | 111.9                       | 2.03            |
| Bacterial     | B12              | 167.8                       | 2.01            |
| Bacterial     | B13              | 83.6                        | 2.05            |
| Bacterial     | B14              | 238.9                       | 2.08            |
| Bacterial     | B2               | 109                         | 2.03            |
| Bacterial     | B3               | 269.8                       | 2.07            |
| Bacterial     | B4               | 207.5                       | 2.07            |
| Bacterial     | B5               | 147.8                       | 1.9             |
| Bacterial     | B6               | 252.4                       | 2.07            |
| Bacterial     | B7               | 283.3                       | 2.06            |
| Bacterial     | B8               | 137.5                       | 2.05            |
| Bacterial     | B9               | 108.8                       | 2.05            |
| Control       | C11              | 261.1                       | 2.06            |
| Control       | C12              | 175.3                       | 2.07            |
| Control       | C13              | 255.5                       | 2.07            |
| Control       | C14              | 175.1                       | 2.07            |
| Control       | C15              | 215.9                       | 2.06            |
| Control       | C16              | 222                         | 2.05            |
| Control       | C2               | 106.3                       | 2.06            |
| Control       | C3               | 99.7                        | 2.03            |
| Control       | C4               | 100.1                       | 2.07            |
| Control       | C6               | 98.2                        | 2.02            |
| Viral         | V1               | 181                         | 2.05            |
| Viral         | V10              | 114.2                       | 2.04            |
| Viral         | V13              | 200                         | 1.9             |
| Viral         | V14              | 80.9                        | 1.9             |
| Viral         | V2               | 136.1                       | 2.08            |
| Viral         | V3               | 69                          | 1.9             |
| Viral         | V5               | 140.5                       | 2.06            |
| Viral         | V6               | 251.4                       | 1.9             |
| Viral         | V7               | 286.4                       | 2.07            |
| Viral         | V8               | 141.8                       | 1.9             |
| Viral         | V9               | 103.6                       | 2.07            |



**Supplementary Table S2. Detailed description of the clinical syndrome, causative pathogen and pathogen detection site of bacterial and viral patients.**

| Sample ID | Clinical syndrome                   | Detection site          | Detection method                               | Pathogen that matches with the syndrome | Categorization               |
|-----------|-------------------------------------|-------------------------|------------------------------------------------|-----------------------------------------|------------------------------|
| B1        | Focal pneumonia+Empyema             | Blood                   | Culture                                        | Streptococcus pneumoniae                | Definite bacterial infection |
| B10       | Sepsis/Meningitis                   | Blood/CSF               | Culture/PCR                                    | Neisseria meningitidis W135             | Definite bacterial infection |
| B11       | Focal pneumonia+pleural effusion    | Pleural liquid          | Culture                                        | Group A Streptococcus pyogenes          | Definite bacterial infection |
| B12       | Sepsis/Meningitis                   | Blood/CSF               | Culture/PCR                                    | Neisseria meningitidis B                | Definite bacterial infection |
| B13       | Sepsis/Meningitis                   | CSF                     | PCR                                            | Neisseria meningitidis B                | Definite bacterial infection |
| B14       | Sepsis                              | Blood                   | Culture                                        | Neisseria meningitidis B                | Definite bacterial infection |
| B2        | Focal pyogenic infection            | Blood                   | Culture                                        | Staphylococcus aureus                   | Definite bacterial infection |
| B3        | Pyelonehritis                       | Blood/Urine             | Culture                                        | Escherichia coli                        | Definite bacterial infection |
| B4        | Sepsis/Meningitis                   | CSF                     | PCR                                            | Neisseria meningitidis B                | Definite bacterial infection |
| B5        | Sepsis                              | Blood                   | Culture                                        | Neisseria meningitidis B                | Definite bacterial infection |
| B6        | Meningitis /Focal pneumonia         | CSF                     | Culture                                        | Streptococcus pneumoniae                | Definite bacterial infection |
| B7        | Urinary tract infection             | Urine                   | Culture                                        | Escherichia coli                        | Definite bacterial infection |
| B8        | Urinary tract infection             | Urine                   | Culture                                        | Escherichia coli                        | Definite bacterial infection |
| B9        | Bone infection                      | Articular aspirate      | Culture                                        | Staphylococcus aureus                   | Definite bacterial infection |
| V1        | Febrile illness/Respiratory illness | Nasopharyngeal swab     | PCR                                            | Adenovirus                              | Definite viral infection     |
| V10       | Febrile illness/Respiratory illness | Nasopharyngeal aspirate | Direct immunofluorescence                      | Adenovirus                              | Definite viral infection     |
| V13       | Bronchiolitis                       | Nasopharyngeal aspirate | Direct immunofluorescence/PCR                  | Respiratory syncytial virus             | Definite viral infection     |
| V14       | Flu-like illness                    | Nasopharyngeal aspirate | Direct immunofluorescence                      | Influenza A                             | Definite viral infection     |
| V2        | Meningitis                          | CFS                     | PCR                                            | Enterovirus                             | Definite viral infection     |
| V3        | Meningitis                          | CFS                     | PCR                                            | Enterovirus                             | Definite viral infection     |
| V5        | Meningitis                          | CFS                     | PCR                                            | Enterovirus                             | Definite viral infection     |
| V6        | Bronchiolitis                       | Nasopharyngeal aspirate | Direct immunofluorescence                      | Respiratory syncytial virus             | Definite viral infection     |
| V7        | Bronchiolitis                       | Nasopharyngeal aspirate | Direct immunofluorescence                      | Respiratory syncytial virus             | Definite viral infection     |
| V8        | Fever/viriasis                      | Nasopharyngeal aspirate | Direct immunofluorescence/Immunochromatography | Influenza A                             | Definite viral infection     |
| V9        | Meningitis                          | CFS                     | PCR                                            | Enterovirus                             | Definite viral infection     |

**Supplementary Table S3. Raw C<sub>t</sub> results obtained from qPCR analysis (SD: standard deviation; C<sub>t</sub>: threshold cycle)**

| Patient group | Sample Name | Target Name | C <sub>t</sub> Mean | C <sub>t</sub> SD |
|---------------|-------------|-------------|---------------------|-------------------|
| Bacterial     | B1          | ACTB        | 22.10749944         | 0.211292444       |
| Bacterial     | B10         | ACTB        | 22.79511451         | 0.248041958       |
| Bacterial     | B11         | ACTB        | 20.08116340         | 0.316745102       |
| Bacterial     | B12         | ACTB        | 18.17631721         | 0.14690046        |
| Bacterial     | B13         | ACTB        | 17.53716087         | 0.073547766       |
| Bacterial     | B14         | ACTB        | 18.11574745         | 0.203547359       |
| Bacterial     | B2          | ACTB        | 20.95109367         | 0.031697132       |
| Bacterial     | B3          | ACTB        | 20.36261177         | 0.028297555       |
| Bacterial     | B4          | ACTB        | 20.83031654         | 0.023548299       |
| Bacterial     | B5          | ACTB        | 22.14953423         | 0.110614948       |
| Bacterial     | B6          | ACTB        | 22.14077759         | 0.346594363       |
| Bacterial     | B7          | ACTB        | 21.48986244         | 0.455580652       |
| Bacterial     | B8          | ACTB        | 21.17649078         | 0.28970018        |
| Bacterial     | B9          | ACTB        | 21.71056366         | 0.093387976       |
| Control       | C11         | ACTB        | 22.85270119         | 0.117699616       |
| Control       | C12         | ACTB        | 22.50065422         | 0.071276776       |
| Control       | C13         | ACTB        | 23.93084145         | 0.041297328       |
| Control       | C14         | ACTB        | 22.56804085         | 0.055717461       |
| Control       | C15         | ACTB        | 22.71550083         | 0.273120637       |
| Control       | C16         | ACTB        | 23.5781002          | 0.367071807       |
| Control       | C2          | ACTB        | 21.06855774         | 0.093600802       |
| Control       | C3          | ACTB        | 21.96365166         | 0.015830193       |
| Control       | C4          | ACTB        | 21.15398598         | 0.078396499       |
| Control       | C6          | ACTB        | 21.11449051         | 0.018531127       |
| Viral         | V1          | ACTB        | 22.51643372         | 0.191271171       |
| Viral         | V10         | ACTB        | 22.21755981         | 0.125931144       |
| Viral         | V13         | ACTB        | 22.36164284         | 0.036983039       |
| Viral         | V14         | ACTB        | 23.58377075         | 0.113426946       |
| Viral         | V2          | ACTB        | 20.85639381         | 0.16352357        |
| Viral         | V3          | ACTB        | 22.57996368         | 0.147466764       |
| Viral         | V5          | ACTB        | 20.72017097         | 0.215403453       |
| Viral         | V6          | ACTB        | 21.43855095         | 0.060992103       |
| Viral         | V7          | ACTB        | 23.35408211         | 0.062957235       |
| Viral         | V8          | ACTB        | 22.9373951          | 0.061539851       |
| Viral         | V9          | ACTB        | 22.73521996         | 0.067996338       |
| Bacterial     | B1          | FAM89A      | 30.83327357         | 0.102168771       |
| Bacterial     | B10         | FAM89A      | 32.2567215          | 0.030375402       |
| Bacterial     | B11         | FAM89A      | 31.60918617         | 0.174855992       |
| Bacterial     | B12         | FAM89A      | 33.83978653         | 0.095375732       |
| Bacterial     | B13         | FAM89A      | 31.41231728         | 0.065162808       |
| Bacterial     | B14         | FAM89A      | 31.84594727         | 0.030053496       |
| Bacterial     | B2          | FAM89A      | 33.84226608         | 0.097805463       |
| Bacterial     | B3          | FAM89A      | 31.41438293         | 0.029801084       |
| Bacterial     | B4          | FAM89A      | 30.04650879         | 0.019356117       |
| Bacterial     | B5          | FAM89A      | 32.81961823         | 0.116712213       |
| Bacterial     | B6          | FAM89A      | 30.65001488         | 0.230723515       |
| Bacterial     | B7          | FAM89A      | 34.18722534         | 0.295884222       |
| Bacterial     | B8          | FAM89A      | 32.55935287         | 0.178552583       |
| Bacterial     | B9          | FAM89A      | 33.38117218         | 0.123354726       |
| Control       | C11         | FAM89A      | 34.78633881         | 0.068546094       |
| Control       | C12         | FAM89A      | 34.45547867         | 0.158003792       |
| Control       | C13         | FAM89A      | 35.55267334         | 0.145061702       |
| Control       | C14         | FAM89A      | 35.10797119         | 0.224798471       |
| Control       | C15         | FAM89A      | 34.376252           | 0.374618295       |
| Control       | C16         | FAM89A      | 35.12350082         | 0.32709828        |
| Control       | C2          | FAM89A      | 34.30958176         | 0.191271171       |
| Control       | C3          | FAM89A      | 32.82543945         | 0.052022405       |
| Control       | C4          | FAM89A      | 32.12509537         | 0.157612443       |
| Control       | C6          | FAM89A      | 33.43808746         | 0.034944795       |
| Viral         | V1          | FAM89A      | 32.20562871         | 0.251244147       |
| Viral         | V10         | FAM89A      | 32.66957092         | 0.087773509       |
| Viral         | V13         | FAM89A      | 31.8833313          | 0.014990726       |
| Viral         | V14         | FAM89A      | 33.25386047         | 0.116368458       |
| Viral         | V2          | FAM89A      | 34.40213013         | 0.436654359       |
| Viral         | V3          | FAM89A      | 32.80054474         | 0.080193654       |
| Viral         | V5          | FAM89A      | 32.96580505         | 0.171559826       |

|           |     |        |             |             |
|-----------|-----|--------|-------------|-------------|
| Viral     | V6  | FAM89A | 33.79992294 | 0.066244923 |
| Viral     | V7  | FAM89A | 33.79601669 | 0.137881771 |
| Viral     | V8  | FAM89A | 33.83935547 | 0.201009855 |
| Viral     | V9  | FAM89A | 34.60550308 | 0.204357103 |
| Bacterial | B1  | GAPDH  | 20.28407288 | 0.087177216 |
| Bacterial | B10 | GAPDH  | 22.64853477 | 0.018191254 |
| Bacterial | B11 | GAPDH  | 20.7711544  | 0.16264987  |
| Bacterial | B12 | GAPDH  | 23.31471062 | 0.258448869 |
| Bacterial | B13 | GAPDH  | 22.71408081 | 0.101686135 |
| Bacterial | B14 | GAPDH  | 22.39276695 | 0.074698351 |
| Bacterial | B2  | GAPDH  | 19.90884781 | 0.083359458 |
| Bacterial | B3  | GAPDH  | 19.14368248 | 0.158102557 |
| Bacterial | B4  | GAPDH  | 20.76605797 | 0.174273968 |
| Bacterial | B5  | GAPDH  | 22.7543087  | 0.012599407 |
| Bacterial | B6  | GAPDH  | 22.27603149 | 0.088016175 |
| Bacterial | B7  | GAPDH  | 22.71754456 | 0.428576171 |
| Bacterial | B8  | GAPDH  | 22.10373878 | 0.362450063 |
| Bacterial | B9  | GAPDH  | 22.81356812 | 0.20931676  |
| Control   | C11 | GAPDH  | 23.82407188 | 0.113771744 |
| Control   | C12 | GAPDH  | 23.83096504 | 0.123389997 |
| Control   | C13 | GAPDH  | 24.14214134 | 0.191271171 |
| Control   | C14 | GAPDH  | 23.59804916 | 0.143562287 |
| Control   | C15 | GAPDH  | 23.67652893 | 0.262886256 |
| Control   | C16 | GAPDH  | 24.1657486  | 0.100275777 |
| Control   | C2  | GAPDH  | 23.46746826 | 0.064174406 |
| Control   | C3  | GAPDH  | 22.96660805 | 0.09281417  |
| Control   | C4  | GAPDH  | 21.88668251 | 0.031083016 |
| Control   | C6  | GAPDH  | 22.67123032 | 0.001095144 |
| Viral     | V1  | GAPDH  | 22.10421753 | 0.087279715 |
| Viral     | V10 | GAPDH  | 22.89881706 | 0.064061433 |
| Viral     | V13 | GAPDH  | 23.01795959 | 0.033813544 |
| Viral     | V14 | GAPDH  | 23.16841698 | 0.02584647  |
| Viral     | V2  | GAPDH  | 22.68534851 | 0.151585743 |
| Viral     | V3  | GAPDH  | 22.96286774 | 0.002584108 |
| Viral     | V5  | GAPDH  | 22.19153786 | 0.075155392 |
| Viral     | V6  | GAPDH  | 22.86863136 | 0.11710085  |
| Viral     | V7  | GAPDH  | 23.54419518 | 0.04492243  |
| Viral     | V8  | GAPDH  | 24.16075897 | 0.046996716 |
| Viral     | V9  | GAPDH  | 23.74048615 | 0.127928883 |
| Bacterial | B1  | GUSB   | 27.95595614 | 0.042075012 |
| Bacterial | B10 | GUSB   | 29.3277092  | 0.089723557 |
| Bacterial | B11 | GUSB   | 26.05183411 | 0.337472707 |
| Bacterial | B12 | GUSB   | 27.52637672 | 0.099549443 |
| Bacterial | B13 | GUSB   | 27.84195518 | 0.092341922 |
| Bacterial | B14 | GUSB   | 27.67903709 | 0.088418022 |
| Bacterial | B2  | GUSB   | 27.84035683 | 0.056144677 |
| Bacterial | B3  | GUSB   | 27.46257782 | 0.133208826 |
| Bacterial | B4  | GUSB   | 27.20935059 | 0.157975733 |
| Bacterial | B5  | GUSB   | 28.9597168  | 0.098725356 |
| Bacterial | B6  | GUSB   | 27.24297523 | 0.348738939 |
| Bacterial | B7  | GUSB   | 27.92786598 | 0.267349273 |
| Bacterial | B8  | GUSB   | 27.02847099 | 0.191271171 |
| Bacterial | B9  | GUSB   | 28.52396393 | 0.154535294 |
| Control   | C11 | GUSB   | 29.20523071 | 0.10078121  |
| Control   | C12 | GUSB   | 28.92201996 | 0.017761895 |
| Control   | C13 | GUSB   | 30.38960266 | 0.07305485  |
| Control   | C14 | GUSB   | 28.77670288 | 0.005788617 |
| Control   | C15 | GUSB   | 28.86887169 | 0.058020268 |
| Control   | C16 | GUSB   | 29.50861168 | 0.118678167 |
| Control   | C2  | GUSB   | 28.30209923 | 0.044578947 |
| Control   | C3  | GUSB   | 28.2623539  | 0.312240809 |
| Control   | C4  | GUSB   | 27.84618568 | 0.051973596 |
| Control   | C6  | GUSB   | 27.79780197 | 0.149666488 |
| Viral     | V1  | GUSB   | 28.37133535 | 0.187239622 |
| Viral     | V10 | GUSB   | 28.21881104 | 0.088585667 |
| Viral     | V13 | GUSB   | 29.27719688 | 0.066123128 |
| Viral     | V14 | GUSB   | 29.90982056 | 0.032755855 |
| Viral     | V2  | GUSB   | 28.56390381 | 0.28584528  |
| Viral     | V3  | GUSB   | 28.55895805 | 0.030925671 |
| Viral     | V5  | GUSB   | 27.77684975 | 0.376625627 |
| Viral     | V6  | GUSB   | 27.79217529 | 0.130265981 |
| Viral     | V7  | GUSB   | 28.8916378  | 0.084914707 |

|           |     |        |             |             |
|-----------|-----|--------|-------------|-------------|
| Viral     | V8  | GUSB   | 29.61716461 | 0.03743412  |
| Viral     | V9  | GUSB   | 29.18592262 | 0.104822643 |
| Bacterial | B1  | IFI44L | 28.3586216  | 0.104959231 |
| Bacterial | B10 | IFI44L | 30.50461197 | 0.160670534 |
| Bacterial | B11 | IFI44L | 26.59154701 | 0.221114695 |
| Bacterial | B12 | IFI44L | 25.9318676  | 0.047944076 |
| Bacterial | B13 | IFI44L | 30.94119263 | 0.049615122 |
| Bacterial | B14 | IFI44L | 31.39826393 | 0.091213346 |
| Bacterial | B2  | IFI44L | 27.29953003 | 0.0470405   |
| Bacterial | B3  | IFI44L | 27.93076324 | 0.034473166 |
| Bacterial | B4  | IFI44L | 29.79635811 | 0.191271171 |
| Bacterial | B5  | IFI44L | 26.55922127 | 0.058854785 |
| Bacterial | B6  | IFI44L | 30.24409485 | 0.234459862 |
| Bacterial | B7  | IFI44L | 25.10074043 | 0.305403829 |
| Bacterial | B8  | IFI44L | 26.56575584 | 0.170235366 |
| Bacterial | B9  | IFI44L | 30.80992889 | 0.21757485  |
| Control   | C11 | IFI44L | 28.84585571 | 0.029855922 |
| Control   | C12 | IFI44L | 29.16104698 | 0.143142655 |
| Control   | C13 | IFI44L | 30.83475685 | 0.028235059 |
| Control   | C14 | IFI44L | 28.93391609 | 0.0574384   |
| Control   | C15 | IFI44L | 27.55944633 | 0.36336077  |
| Control   | C16 | IFI44L | 29.84741974 | 0.136686996 |
| Control   | C2  | IFI44L | 28.92222023 | 0.027944246 |
| Control   | C3  | IFI44L | 29.43231964 | 0.151187733 |
| Control   | C4  | IFI44L | 29.4243145  | 0.074447475 |
| Control   | C6  | IFI44L | 27.88807297 | 0.121295258 |
| Viral     | V1  | IFI44L | 25.2016449  | 0.254463106 |
| Viral     | V10 | IFI44L | 23.90198708 | 0.106612153 |
| Viral     | V13 | IFI44L | 24.95925331 | 0.029730543 |
| Viral     | V14 | IFI44L | 26.97307968 | 0.008673484 |
| Viral     | V2  | IFI44L | 25.17340279 | 0.132509068 |
| Viral     | V3  | IFI44L | 25.91637039 | 0.027731951 |
| Viral     | V5  | IFI44L | 27.86662483 | 0.14246051  |
| Viral     | V6  | IFI44L | 25.80592346 | 0.057350427 |
| Viral     | V7  | IFI44L | 24.63241577 | 0.047481652 |
| Viral     | V8  | IFI44L | 23.53855133 | 0.078432761 |
| Viral     | V9  | IFI44L | 25.5846405  | 0.102096438 |
| Bacterial | B1  | PGK1   | 24.57128588 | 0.085367545 |
| Bacterial | B10 | PGK1   | 24.80212021 | 0.055063341 |
| Bacterial | B11 | PGK1   | 23.60890198 | 0.307620198 |
| Bacterial | B12 | PGK1   | 25.93564415 | 0.073992707 |
| Bacterial | B13 | PGK1   | 25.05731773 | 0.191271171 |
| Bacterial | B14 | PGK1   | 24.84452057 | 0.02959205  |
| Bacterial | B2  | PGK1   | 24.38299751 | 0.041967079 |
| Bacterial | B3  | PGK1   | 23.88458443 | 0.079495907 |
| Bacterial | B4  | PGK1   | 23.61092949 | 0.010789379 |
| Bacterial | B5  | PGK1   | 24.8897686  | 0.101490937 |
| Bacterial | B6  | PGK1   | 24.6574192  | 0.280075401 |
| Bacterial | B7  | PGK1   | 25.28822136 | 0.382258683 |
| Bacterial | B8  | PGK1   | 23.97909546 | 0.080619946 |
| Bacterial | B9  | PGK1   | 25.02650452 | 0.224795774 |
| Control   | C11 | PGK1   | 25.80862236 | 0.138073891 |
| Control   | C12 | PGK1   | 25.58380127 | 0.028963339 |
| Control   | C13 | PGK1   | 26.83051872 | 0.056962684 |
| Control   | C14 | PGK1   | 25.55394363 | 0.085007161 |
| Control   | C15 | PGK1   | 25.85899099 | 0.333969727 |
| Control   | C16 | PGK1   | 26.36032677 | 0.118107475 |
| Control   | C2  | PGK1   | 25.75952721 | 0.043821406 |
| Control   | C3  | PGK1   | 25.14301109 | 0.19091098  |
| Control   | C4  | PGK1   | 24.20117188 | 0.176068842 |
| Control   | C6  | PGK1   | 24.83243179 | 0.187241256 |
| Viral     | V1  | PGK1   | 23.83847809 | 0.1900924   |
| Viral     | V10 | PGK1   | 24.67484983 | 0.381337563 |
| Viral     | V13 | PGK1   | 25.58842659 | 0.036146171 |
| Viral     | V14 | PGK1   | 25.90872955 | 0.074518323 |
| Viral     | V2  | PGK1   | 24.47222328 | 0.184422001 |
| Viral     | V3  | PGK1   | 25.02218246 | 0.05807903  |
| Viral     | V5  | PGK1   | 24.55700874 | 0.203741223 |
| Viral     | V6  | PGK1   | 25.27843666 | 0.038417961 |
| Viral     | V7  | PGK1   | 26.13157082 | 0.10645552  |
| Viral     | V8  | PGK1   | 26.00800133 | 0.187945053 |
| Viral     | V9  | PGK1   | 26.28646088 | 0.040554035 |

|           |     |     |             |             |
|-----------|-----|-----|-------------|-------------|
| Bacterial | B1  | TBP | 30.26392746 | 0.191271171 |
| Bacterial | B10 | TBP | 30.80063248 | 0.050619375 |
| Bacterial | B11 | TBP | 28.35820961 | 0.37391603  |
| Bacterial | B12 | TBP | 26.72585869 | 0.262974143 |
| Bacterial | B13 | TBP | 27.86510468 | 0.117132843 |
| Bacterial | B14 | TBP | 27.40779686 | 0.165918112 |
| Bacterial | B2  | TBP | 29.76553917 | 0.184796542 |
| Bacterial | B3  | TBP | 29.77502251 | 0.169930115 |
| Bacterial | B4  | TBP | 29.53719139 | 0.136273906 |
| Bacterial | B5  | TBP | 30.83573151 | 0.138732061 |
| Bacterial | B6  | TBP | 29.78657532 | 0.467372864 |
| Bacterial | B7  | TBP | 29.43255615 | 0.435049623 |
| Bacterial | B8  | TBP | 29.46862793 | 0.49012664  |
| Bacterial | B9  | TBP | 30.4935112  | 0.201186806 |
| Control   | C11 | TBP | 29.81539917 | 0.118451454 |
| Control   | C12 | TBP | 29.43815613 | 0.143108547 |
| Control   | C13 | TBP | 31.10685158 | 0.169756532 |
| Control   | C14 | TBP | 29.57775307 | 0.232283756 |
| Control   | C15 | TBP | 29.92817434 | 0.172708751 |
| Control   | C16 | TBP | 30.78953552 | 0.061754767 |
| Control   | C2  | TBP | 29.41057396 | 0.030723667 |
| Control   | C3  | TBP | 29.30977821 | 0.252083719 |
| Control   | C4  | TBP | 28.96174622 | 0.010970379 |
| Control   | C6  | TBP | 28.69813919 | 0.06923008  |
| Viral     | V1  | TBP | 29.94618416 | 0.04370073  |
| Viral     | V10 | TBP | 29.79943275 | 0.231584787 |
| Viral     | V13 | TBP | 30.7964077  | 0.120825306 |
| Viral     | V14 | TBP | 30.89377594 | 0.120132677 |
| Viral     | V2  | TBP | 30.47776222 | 0.113915756 |
| Viral     | V3  | TBP | 29.78895187 | 0.042385567 |
| Viral     | V5  | TBP | 29.53377724 | 0.108878255 |
| Viral     | V6  | TBP | 29.19589424 | 0.191271171 |
| Viral     | V7  | TBP | 29.9506855  | 0.043601394 |
| Viral     | V8  | TBP | 31.18650246 | 0.010755503 |
| Viral     | V9  | TBP | 30.19477272 | 0.100608915 |

**Supplementary Table S4. Descriptive statistical analysis of the candidate reference genes.**

| Reference Gene | Group     | Max         | Min         | Median      | Mean        | Standard Deviation |
|----------------|-----------|-------------|-------------|-------------|-------------|--------------------|
| PGK1           | All       | 26.83051872 | 23.60890198 | 25.02434349 | 25.05621683 | 0.842901198        |
|                | Bacterial | 25.93564415 | 23.60890198 | 24.72976971 | 24.60995079 | 0.664538661        |
|                | Viral     | 26.28646088 | 23.78578091 | 25.15030956 | 25.12934576 | 0.874110689        |
|                | Control   | 26.83051872 | 24.20117188 | 25.67166424 | 25.59323457 | 0.744234691        |
| GUSB           | All       | 30.38960266 | 26.05183411 | 28.28222656 | 28.33408202 | 0.906817281        |
|                | Bacterial | 29.3277092  | 26.05183411 | 27.75969696 | 27.7555819  | 0.819626621        |
|                | Viral     | 29.90982056 | 27.40555    | 28.56143093 | 28.63077715 | 0.77361538         |
|                | Control   | 30.38960266 | 27.79780197 | 28.82278728 | 28.78794804 | 0.793237575        |
| TBP            | All       | 31.18650246 | 26.72585869 | 29.78079891 | 29.67086218 | 0.997325346        |
|                | Bacterial | 30.83573151 | 26.72585869 | 29.65136528 | 29.32259178 | 1.267668169        |
|                | Viral     | 31.18650246 | 28.83449936 | 29.94843483 | 30.04988718 | 0.69997761         |
|                | Control   | 31.10685158 | 28.69813919 | 29.5079546  | 29.70361074 | 0.752762311        |
| GAPDH          | All       | 24.1657486  | 19.14368248 | 22.78393841 | 22.60554187 | 1.200781349        |
|                | Bacterial | 23.31471062 | 19.14368248 | 22.33439922 | 21.75779288 | 1.31070111         |
|                | Viral     | 24.16075897 | 21.61767578 | 22.9308424  | 22.91340939 | 0.715114659        |
|                | Control   | 24.1657486  | 21.88668251 | 23.63728905 | 23.42294941 | 0.716996289        |
| ACTB           | All       | 23.93084145 | 17.53716087 | 22.03557555 | 21.64838702 | 1.48302391         |
|                | Bacterial | 22.79511452 | 17.53716087 | 21.06379223 | 20.68744669 | 1.665145299        |
|                | Viral     | 23.58377075 | 20.72017097 | 22.43903828 | 22.18926287 | 0.973953667        |
|                | Control   | 23.93084145 | 21.06855774 | 22.53434753 | 22.34465246 | 1.011700122        |

**Supplementary Table S5. Stability values of candidate reference genes calculated through different methods available. (SD: standard deviation).**

|                        | Reference Genes | Comprehensive Ranking            | Method                           |                                    |                                      |                                                     |
|------------------------|-----------------|----------------------------------|----------------------------------|------------------------------------|--------------------------------------|-----------------------------------------------------|
|                        |                 | Rank (Geomean of ranking values) | Delta CT<br>Rank (Average of SD) | BestKeeper<br>Rank (Average of SD) | NormFinder<br>Rank (Stability value) | Genorm<br>Rank (Average expression Stability value) |
| <b>All</b>             | <i>GUSB</i>     | 1 (1.32)                         | 1 (0.84)                         | 3 (0.73)                           | 1 (0.11)                             | 1 (0.61)                                            |
|                        | <i>PGK1</i>     | 2 (1.41)                         | 2 (0.95)                         | 1 (0.68)                           | 2 (0.61)                             | 1 (0.61)                                            |
|                        | <i>TBP</i>      | 3 (2.91)                         | 3 (1.04)                         | 2 (0.71)                           | 3 (0.76)                             | 3 (0.92)                                            |
|                        | <i>ACTB</i>     | 5 (5.00)                         | 5 (1.20)                         | 5 (1.14)                           | 5 (1.02)                             | 4 (1.03)                                            |
|                        | <i>GAPDH</i>    | 4 (3.72)                         | 4 (1.13)                         | 4 (0.87)                           | 4 (0.94)                             | 2 (0.74)                                            |
| <b>Viral+Bacterial</b> | <i>GUSB</i>     | 1 (1.32)                         | 1 (0.84)                         | 3 (0.73)                           | 1 (0.11)                             | 1 (0.61)                                            |
|                        | <i>PGK1</i>     | 2 (1.41)                         | 2 (0.95)                         | 1 (0.63)                           | 2 (0.61)                             | 1 (0.61)                                            |
|                        | <i>TBP</i>      | 3 (2.91)                         | 3 (1.04)                         | 2 (0.71)                           | 3 (0.76)                             | 3 (0.92)                                            |
|                        | <i>ACTB</i>     | 5 (5.00)                         | 5 (1.20)                         | 5 (1.14)                           | 5 (1.02)                             | 4 (1.03)                                            |
|                        | <i>GAPDH</i>    | 4 (3.72)                         | 4 (1.13)                         | 4 (0.86)                           | 4 (0.94)                             | 2 (0.74)                                            |
| <b>Control</b>         | <i>GUSB</i>     | 1 (1.41)                         | 1 (0.34)                         | 4 (0.59)                           | 1 (0.12)                             | 1 (0.25)                                            |
|                        | <i>PGK1</i>     | 3 (2.06)                         | 2 (0.36)                         | 1 (0.53)                           | 3 (0.23)                             | 2 (0.29)                                            |
|                        | <i>TBP</i>      | 2 (2.06)                         | 3 (0.37)                         | 3 (0.57)                           | 2 (0.22)                             | 1 (0.25)                                            |
|                        | <i>ACTB</i>     | 5 (5.00)                         | 5 (0.49)                         | 5 (0.82)                           | 5 (0.43)                             | 4 (0.40)                                            |
|                        | <i>GAPDH</i>    | 4 (3.36)                         | 4 (0.44)                         | 2 (0.55)                           | 4 (0.36)                             | 3 (0.34)                                            |
| <b>Bacterial</b>       | <i>GUSB</i>     | 1 (1.57)                         | 1 (1.16)                         | 2 (0.58)                           | 1 (0.20)                             | 2 (1.11)                                            |
|                        | <i>PGK1</i>     | 2 (2.00)                         | 2 (1.30)                         | 1 (0.51)                           | 2 (0.82)                             | 3 (1.27)                                            |
|                        | <i>TBP</i>      | 3 (2.28)                         | 3 (1.35)                         | 3 (0.99)                           | 3 (0.94)                             | 1 (0.70)                                            |
|                        | <i>ACTB</i>     | 4 (3.16)                         | 4 (1.61)                         | 5 (1.31)                           | 5 (1.42)                             | 1 (0.70)                                            |
|                        | <i>GADPH</i>    | 5 (4.47)                         | 5 (1.62)                         | 4 (1.13)                           | 4 (1.41)                             | 4 (1.41)                                            |
| <b>Viral</b>           | <i>GUSB</i>     | 1 (1.32)                         | 1 (0.52)                         | 3 (0.58)                           | 1 (0.18)                             | 1 (0.31)                                            |
|                        | <i>PGK1</i>     | 4 (3.72)                         | 4 (0.64)                         | 4 (0.67)                           | 3 (0.48)                             | 3 (0.53)                                            |
|                        | <i>TBP</i>      | 3 (2.21)                         | 3 (0.63)                         | 2 (0.50)                           | 4 (0.50)                             | 1 (0.31)                                            |
|                        | <i>ACTB</i>     | 5 (5.00)                         | 5 (0.75)                         | 5 (0.72)                           | 5 (0.64)                             | 4 (0.62)                                            |
|                        | <i>GAPDH</i>    | 2 (1.86)                         | 2 (0.56)                         | 1 (0.45)                           | 2 (0.32)                             | 2 (0.48)                                            |

**Supplementary Table S6. Statistical differences between bacterial, viral and control groups using relative expression data from *FAM89A* and *IFI44L* genes and different reference genes. Cells in red colour indicate no statistical differences between the groups mentioned (p-value > 0.05).**

| Genes of Interest   | Reference gene/s | Statistical tests p-values |                       |                               |                                   |                       | Post-hoc analysis p-values |                                |                       | Groups |
|---------------------|------------------|----------------------------|-----------------------|-------------------------------|-----------------------------------|-----------------------|----------------------------|--------------------------------|-----------------------|--------|
|                     |                  | Normality test             | Homoscedasticity test | Parametric & Homoscedasticity | Parametric & Non-homoscedasticity | Non-parametric        | Homoscedasticity           | Non-homoscedasticity/normality |                       |        |
|                     |                  | <i>Shapiro-Wilk</i>        | <i>Breusch-Pagan</i>  | <i>One factor ANOVA</i>       | <i>Robust one way ANOVA</i>       | <i>Kruskal-Wallis</i> | <i>Tukey</i>               | <i>Games-Howell</i>            |                       |        |
| IFI44L              | ACTB             | 0.010                      | 0.016                 | -                             |                                   | 1.5E-4                | -                          | 0.460                          | Bacterial vs. Control |        |
|                     |                  |                            |                       |                               |                                   |                       | -                          | 1.6E-4                         | Bacterial vs. Viral   |        |
|                     |                  |                            |                       |                               |                                   |                       | -                          | 7.2E-5                         | Control vs. Viral     |        |
|                     | GUSB             | 0.639                      | 0.053                 | 1.7E-6                        |                                   | -                     | 0.840                      | -                              | Bacterial vs. Control |        |
|                     |                  |                            |                       |                               |                                   |                       | 3.0E-6                     | -                              | Bacterial vs. Viral   |        |
|                     |                  |                            |                       |                               |                                   |                       | 5.3E-5                     | -                              | Control vs. Viral     |        |
|                     | PGK1             | 0.664                      | 0.048                 |                               | 2.3E-5                            |                       | -                          | 0.880                          | Bacterial vs. Control |        |
|                     |                  |                            |                       |                               |                                   |                       | -                          | 2.5E-4                         | Bacterial vs. Viral   |        |
|                     |                  |                            |                       |                               |                                   |                       | -                          | 5.3E-5                         | Control vs. Viral     |        |
|                     | TBP              | 0.130                      | 0.015                 |                               | 1.2E-6                            |                       | -                          | 0.920                          | Bacterial vs. Control |        |
|                     |                  |                            |                       |                               |                                   |                       | -                          | 2.4E-4                         | Bacterial vs. Viral   |        |
|                     |                  |                            |                       |                               |                                   |                       | -                          | 3.6E-6                         | Control vs. Viral     |        |
| GAPDH               | 0.231            | 0.051                      | 8.3E-6                |                               |                                   | 0.400                 | -                          | Bacterial vs. Control          |                       |        |
|                     |                  |                            |                       |                               |                                   | 6.8E-6                | -                          | Bacterial vs. Viral            |                       |        |
|                     |                  |                            |                       |                               |                                   | 8.8E-4                | -                          | Control vs. Viral              |                       |        |
| GUSB-PGK1           | 0.865            | 0.050                      | 5.4E-6                |                               |                                   | 0.87                  | -                          | Bacterial vs. Control          |                       |        |
|                     |                  |                            |                       |                               |                                   | 8.9E-6                | -                          | Bacterial vs. Viral            |                       |        |
|                     |                  |                            |                       |                               |                                   | 1.3E-4                | -                          | Control vs. Viral              |                       |        |
| GUSB-PGK1-TBP       | 0.937            | 0.042                      |                       | 4.1E-6                        |                                   | -                     | 0.960                      | Bacterial vs. Control          |                       |        |
|                     |                  |                            |                       |                               |                                   | -                     | 8.4E-5                     | Bacterial vs. Viral            |                       |        |
|                     |                  |                            |                       |                               |                                   | -                     | 1.1E-5                     | Control vs. Viral              |                       |        |
| GUSB-PGK1-TBP-GAPDH | 0.805            | 0.054                      | 2.9E-6                |                               |                                   | 0.820                 | -                          | Bacterial vs. Control          |                       |        |
|                     |                  |                            |                       |                               |                                   | 4.7E-6                | -                          | Bacterial vs. Viral            |                       |        |
|                     |                  |                            |                       |                               |                                   | 9.0E-5                | -                          | Control vs. Viral              |                       |        |
| FAM89A              | ACTB             | 0.731                      | 0.015                 | -                             | 0.194                             |                       | -                          | 0.830                          | Bacterial vs. Control |        |
|                     |                  |                            |                       |                               |                                   |                       | -                          | 0.740                          | Bacterial vs. Viral   |        |
|                     |                  |                            |                       |                               |                                   |                       | -                          | 0.170                          | Control vs. Viral     |        |
|                     | GUSB             | 0.717                      | 0.136                 | 0.075                         |                                   | -                     | 0.079                      | -                              | Bacterial vs. Control |        |
|                     |                  |                            |                       |                               |                                   |                       | 0.962                      | -                              | Bacterial vs. Viral   |        |
|                     |                  |                            |                       |                               |                                   |                       | 0.161                      | -                              | Control vs. Viral     |        |
|                     | PGK1             | 0.458                      | 0.161                 | 0.028                         |                                   |                       | 0.022                      | -                              | Bacterial vs. Control |        |
|                     |                  |                            |                       |                               |                                   |                       | 0.413                      | -                              | Bacterial vs. Viral   |        |
|                     |                  |                            |                       |                               |                                   |                       | 0.310                      | -                              | Control vs. Viral     |        |
|                     | TBP              | 0.165                      | 0.011                 |                               | 0.002                             |                       | -                          | 0.021                          | Bacterial vs. Control |        |
|                     |                  |                            |                       |                               |                                   |                       | -                          | 0.897                          | Bacterial vs. Viral   |        |
|                     |                  |                            |                       |                               |                                   |                       | -                          | 0.006                          | Control vs. Viral     |        |
|                     | GAPDH            | 0.031                      | 0.006                 |                               |                                   | 0.177                 | -                          | 0.680                          | Bacterial vs. Control |        |
|                     |                  |                            |                       |                               |                                   |                       | -                          | 0.920                          | Bacterial vs. Viral   |        |
|                     |                  |                            |                       |                               |                                   |                       | -                          | 0.180                          | Control vs. Viral     |        |
|                     | GUSB-PGK1        | 0.771                      | 0.152                 | 0.041                         |                                   |                       | 0.033                      | -                              | Bacterial vs. Control |        |
|                     |                  |                            |                       |                               |                                   |                       | 0.711                      | -                              | Bacterial vs. Viral   |        |
|                     |                  |                            |                       |                               |                                   |                       | 0.198                      | -                              | Control vs. Viral     |        |
| GUSB-PGK1-TBP       | 0.882            | 0.097                      | 0.022                 |                               |                                   | 0.019                 | -                          | Bacterial vs. Control          |                       |        |
|                     |                  |                            |                       |                               |                                   | 0.772                 | -                          | Bacterial vs. Viral            |                       |        |
|                     |                  |                            |                       |                               |                                   | 0.107                 | -                          | Control vs. Viral              |                       |        |
| GUSB-PGK1-TBP-GAPDH | 0.813            | 0.087                      | 0.053                 |                               |                                   | 0.054                 | -                          | Bacterial vs. Control          |                       |        |
|                     |                  |                            |                       |                               |                                   | 0.937                 | -                          | Bacterial vs. Viral            |                       |        |
|                     |                  |                            |                       |                               |                                   | 0.133                 | -                          | Control vs. Viral              |                       |        |



**Supplementary Table S7. Statistical differences in DRS calculated from the different normalization references.**

|                                              | Test                                  | All samples    | Viral-Bacterial samples |
|----------------------------------------------|---------------------------------------|----------------|-------------------------|
|                                              |                                       | <i>p-value</i> | <i>p-value</i>          |
|                                              | <b>Kruskal-Wallis</b>                 | 0.001          | 0.011                   |
|                                              | <b>POST-HOC Games-Howell</b>          |                |                         |
| Gene/s used to normalize the expression data | ACTB vs. GAPDH                        | 0.999          | 1.000                   |
|                                              | ACTB vs. GUSB                         | 0.042          | 0.179                   |
|                                              | ACTB vs. GUSB-PGK1                    | 0.298          | 0.578                   |
|                                              | ACTB vs. GUSB-PGK1-TBP                | 0.106          | 0.310                   |
|                                              | ACTB vs. GUSB-PGK1-TBP-GAPDH          | 0.407          | 0.675                   |
|                                              | ACTB vs. PGK1                         | 0.798          | 0.926                   |
|                                              | ACTB vs. TBP                          | 0.007          | 0.044                   |
|                                              | GAPDH vs. GUSB                        | 0.097          | 0.287                   |
|                                              | GAPDH vs. GUSB-PGK1                   | 0.526          | 0.756                   |
|                                              | GAPDH vs. GUSB-PGK1-TBP               | 0.227          | 0.467                   |
|                                              | GAPDH vs. GUSB-PGK1-TBP-GAPDH         | 0.655          | 0.838                   |
|                                              | GAPDH vs. PGK1                        | 0.951          | 0.984                   |
|                                              | GAPDH vs. TBP                         | 0.017          | 0.073                   |
|                                              | GUSB vs. GUSB-PGK1                    | 0.964          | 0.987                   |
|                                              | GUSB vs. GUSB-PGK1-TBP                | 0.999          | 1.000                   |
|                                              | GUSB vs. GUSB-PGK1-TBP-GAPDH          | 0.916          | 0.968                   |
|                                              | GUSB vs. PGK1                         | 0.570          | 0.776                   |
|                                              | GUSB vs. TBP                          | 0.976          | 0.985                   |
|                                              | GUSB-PGK1 vs. GUSB-PGK1-TBP           | 0.999          | 1.000                   |
|                                              | GUSB-PGK1 vs. GUSB-PGK1-TBP-GAPDH     | 1.000          | 1.000                   |
|                                              | GUSB-PGK1 vs. PGK1                    | 0.988          | 0.996                   |
|                                              | GUSB-PGK1 vs. TBP                     | 0.514          | 0.673                   |
|                                              | GUSB-PGK1-TBP vs. GUSB-PGK1-TBP-GAPDH | 0.994          | 0.998                   |
|                                              | GUSB-PGK1-TBP vs. PGK1                | 0.837          | 0.930                   |
| GUSB-PGK1-TBP vs. TBP                        | 0.842                                 | 0.908          |                         |
| GUSB-PGK1-TBP-GAPDH vs. PGK1                 | 0.998                                 | 0.999          |                         |
| GUSB-PGK1-TBP-GAPDH vs. TBP                  | 0.406                                 | 0.585          |                         |
| PGK1 vs. TBP                                 | 0.142                                 | 0.300          |                         |
